# Supplementary material for: Mo doped Ni2P nanowire arrays: an efficient electrocatalyst for the hydrogen evolution reaction with enhanced activity at all pH values
Source: Royal Society of Chemistry journal article supplement (doi:10.1039/c7nr03515b), 2017-01-01
Supplement: c7nr03515b2.pdf [file c7nr03515b2.pdf]

# **Mo doped Ni<sub>2</sub>P Nanowire Arrays: An Efficient Electrocatalyst for Hydrogen Evolution Reaction with Enhanced Activity at All pH Values**

Yiqiang Sun<sup>a,b</sup>, Lifeng Hang<sup>a,b</sup>, Qi Shen<sup>c</sup>, Tao Zhang<sup>a,b</sup>, Huilin Li<sup>a,b</sup>, Xiaomin Zhang<sup>d</sup>, Xianjun Lyu<sup>e</sup>, Yue Li<sup>a\*</sup>

a Key Lab of Materials Physics, Anhui Key Lab of Nanomaterials and Nanotechnology, Institute of Solid State Physics, Chinese Academy of Sciences, Hefei, 230031, P. R. China

b University of Science and Technology of China, Hefei, 230026, P. R. China

c Shandong Product Quality Inspection Research Institute, Jinan, 250102, Shandong, P. R. China

d Xi'an University of Architecture and Technology, Xi' an, 710055, P.R. China

e College of Chemical and Environmental Engineering, Shandong University of Science and Technology, Qingdao, 266590, P.R. China

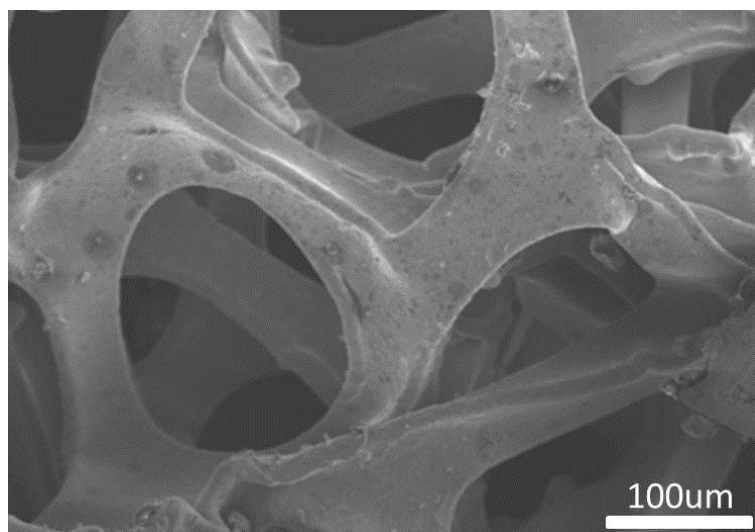

**Figure S1.** The SEM image of bare Ni foam.

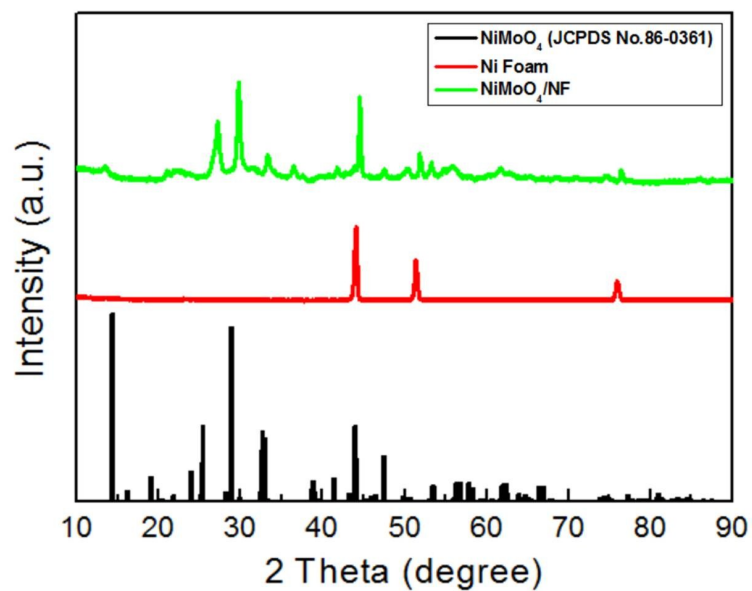

**Figure S2.** XRD pattern of Ni foam and as-prepared NiMoO<sub>4</sub> nanowires on Ni foam..

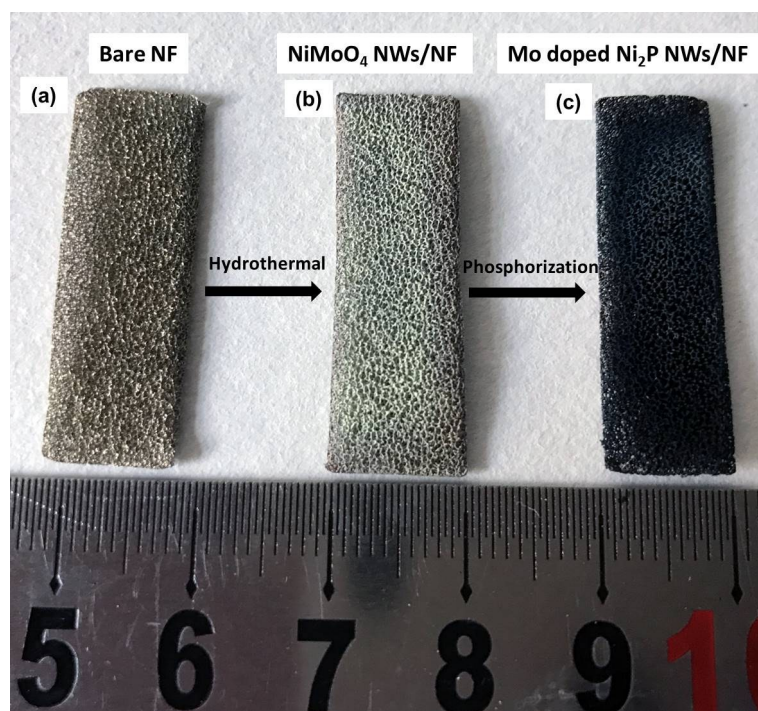

**Figure S3.** The photographic images of (a) Ni foam (NF), (b) NiMoO<sub>4</sub> MWs /NF, and (c) Mo doped Ni<sub>2</sub>P MWs/NF.

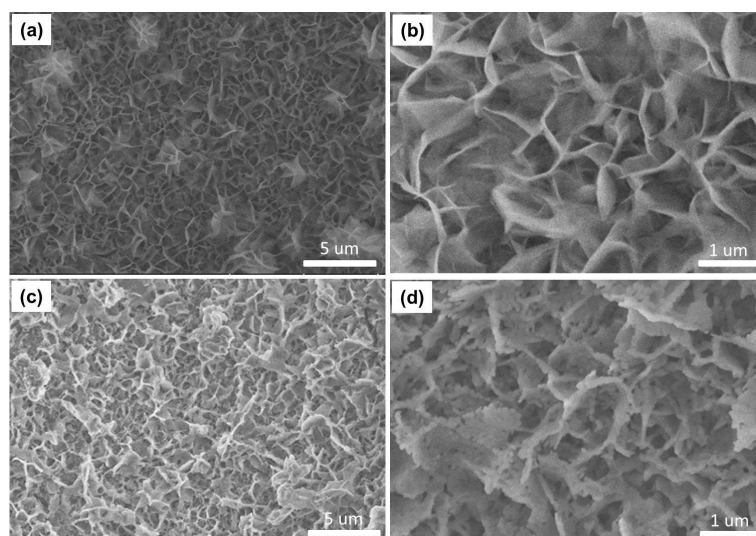

**Figure S4.** SEM images for hydroxide precursor sheets on NF and SEM images (c, d) for Ni<sub>2</sub>P porous sheets/NF.

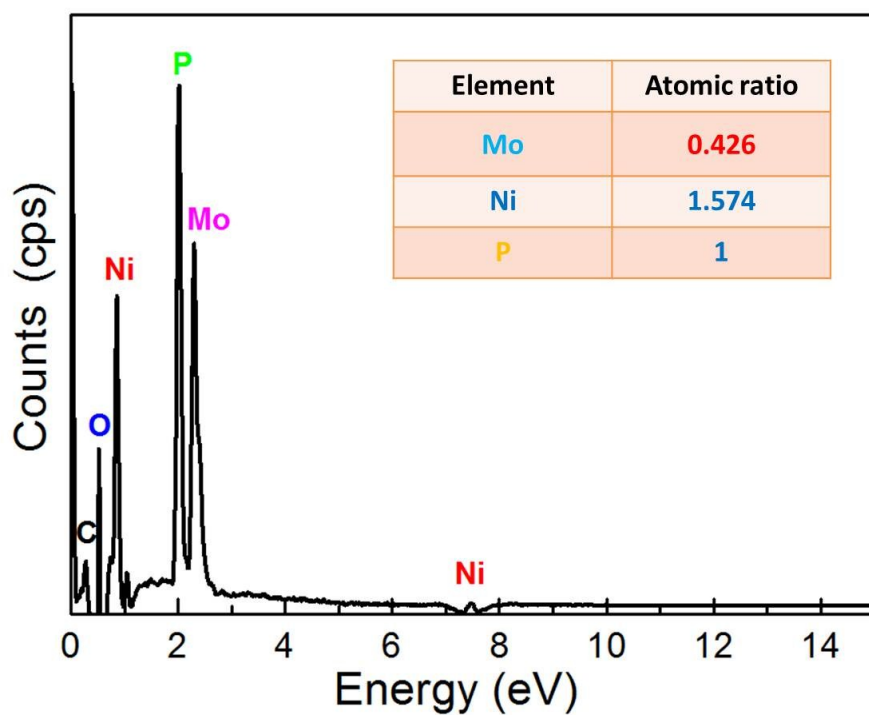

**Figure S5.** EDS spectrum of Mo-Ni<sub>2</sub>P nanowires peeled off from the integrated electrode.

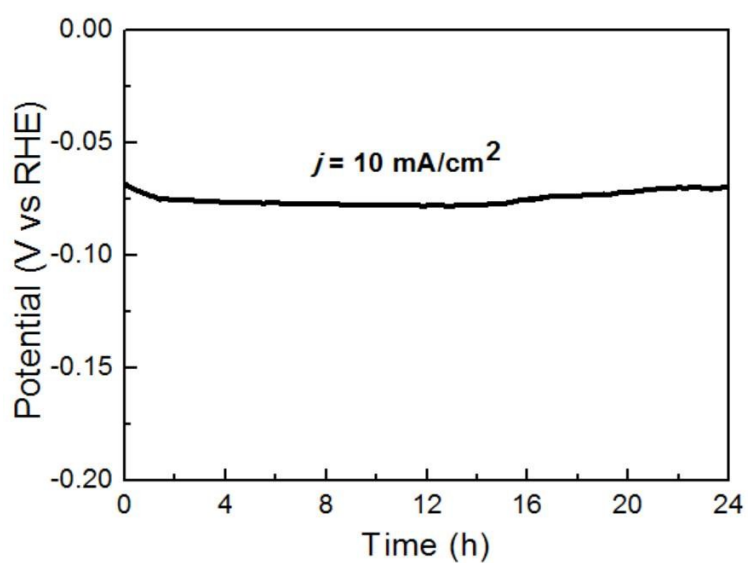

**Figure S6.** Chronopotentiometric curve for Mo-Ni<sub>2</sub>P/NF with a constant current density of  $10 \text{ mA cm}^{-2}$  for 24 h.

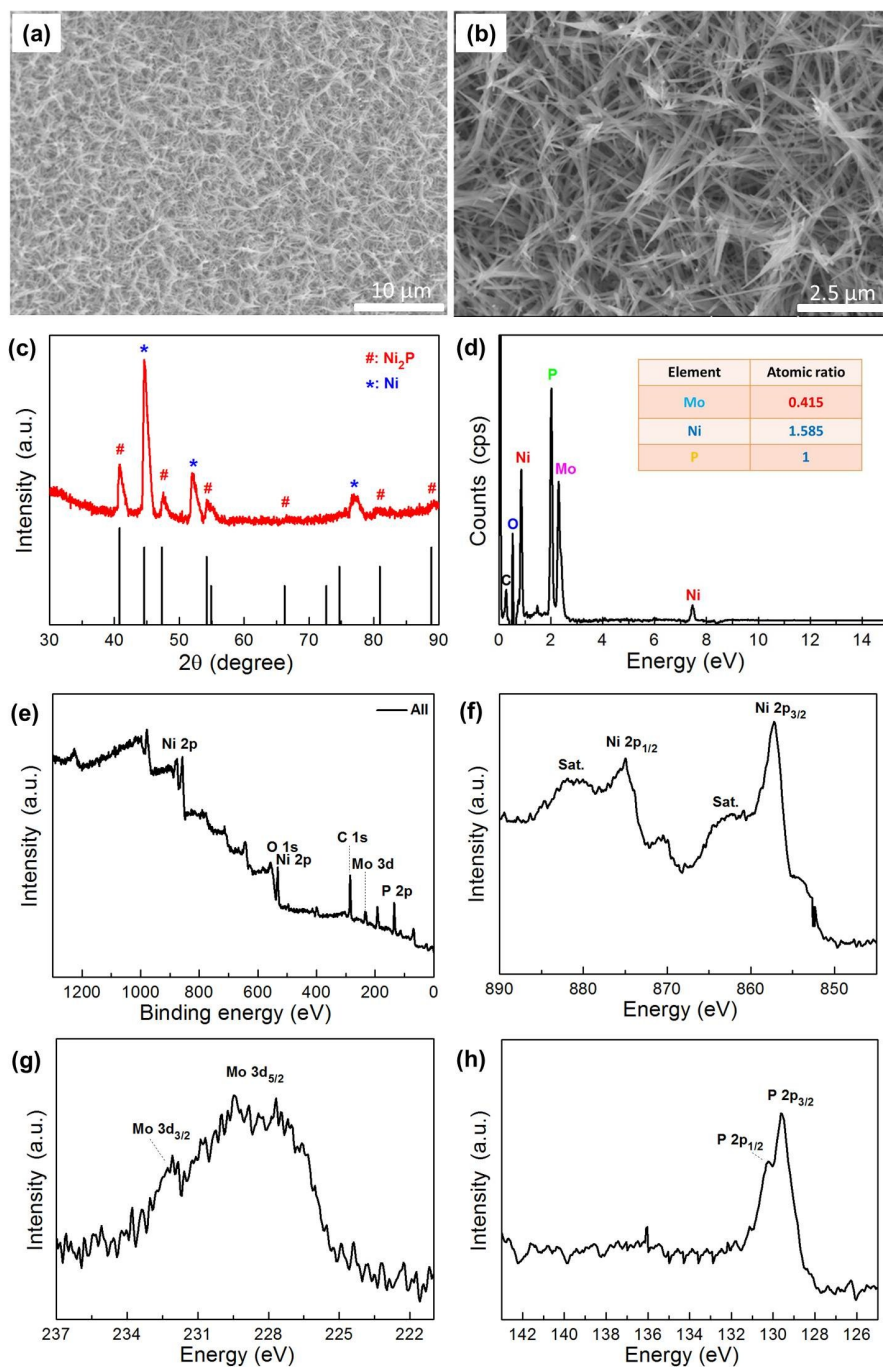

**Figure S7.** (a, b) SEM images, (c) XRD pattern, (d) EDS spectrum, (e-h) XPS spectra of Mo-Ni<sub>2</sub>P/NF after HER electrolysis in basic condition.



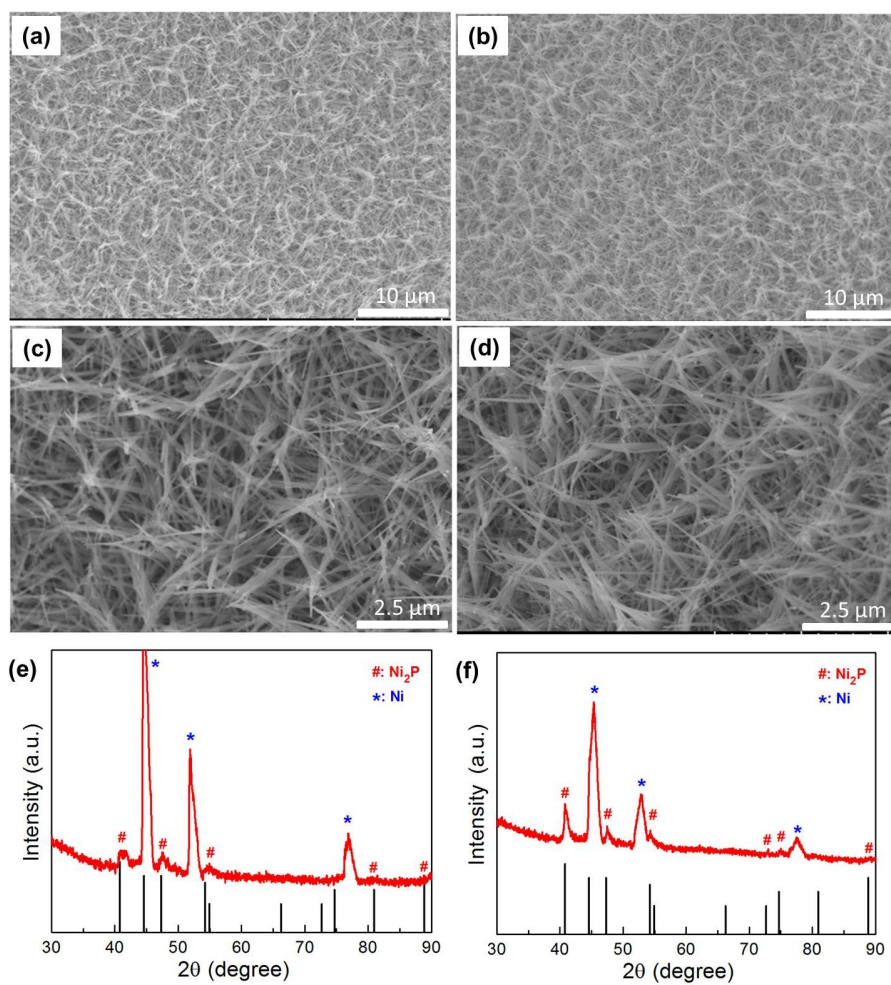

**Figure S8.** (a, c) SEM images, (e) XRD pattern of Mo-Ni<sub>2</sub>P/NF after HER electrolysis in acidic condition. (b, d) SEM images, (f) XRD pattern of Mo-Ni<sub>2</sub>P/NF after HER electrolysis in neutral solution.

**Table S1.** Comparison of the HER performance of Mo-Ni<sub>2</sub>P/NF with other reported non-precious HER electrocatalysts in basic electrolyte.

| Catalyst                                         | Water electrolysis test | Overpotential (10mA cm <sup>-2</sup> ) | Electrolyte | Reference                               |
|--------------------------------------------------|-------------------------|----------------------------------------|-------------|-----------------------------------------|
| Mo-Ni <sub>2</sub> P                             | HER                     | 78                                     | 1M KOH      | This work                               |
| Ni <sub>3</sub> S <sub>2</sub> /NF               | HER                     | 223                                    | 1M KOH      | J. Am. Chem. Soc. 2015, 137,14023       |
| NiSe/NF                                          | HER                     | 96                                     | 1 M KOH     | Angew. Chem. Int. Ed. 2015, 54,1        |
| Ni-Mn <sub>3</sub> O <sub>4</sub> /NF            | HER                     | 91                                     | 1 M KOH     | Chem. Commun. 2016, 52, 10566           |
| Ni <sub>5</sub> P <sub>4</sub> /nanosheets       | HER                     | 150                                    | 1M KOH      | Angew. Chem., 2015, 127, 12538.         |
| Ni-P/films                                       | HER                     | 93                                     | 1M KOH      | ChemCatChem, 2016, 8, 106.              |
| NiSe <sub>2</sub> NPs                            | HER                     | 96                                     | 1 M KOH     | ACS Appl. Mater. Inter., 2016, 8, 4718. |
| Ni-Fe/nanocarbon                                 | HER                     | 219                                    | 1 M KOH     | ACS Catal. 2016, 6, 580.                |
| Ni <sub>2</sub> P nanoparticles                  | HER                     | 230                                    | 1 M KOH     | Phys. Chem. Chem. Phys. 2014, 16, 5917. |
| Ni <sub>1</sub> Mn <sub>1</sub> porous materials | HER                     | 360                                    | 1 M KOH     | Adv. Funct. Mater. 2015, 25, 393.       |
| NiSe nanowire/NF                                 | HER                     | 96                                     | 1 M KOH     | Angew. Chem. Int. Ed. 2015, 54, 9351    |

**Table S2.** Comparison of the HER performance of Mo-Ni<sub>2</sub>P/NF with other reported non-precious HER electrocatalysts in acidic electrolyte.

| Catalyst                                 | Water electrolysis test | Overpotential (10mA cm <sup>-2</sup> ) | Electrolyte                         | Reference                              |
|------------------------------------------|-------------------------|----------------------------------------|-------------------------------------|----------------------------------------|
| Mo-Ni <sub>2</sub> P                     | HER                     | 67                                     | 0.5M H <sub>2</sub> SO <sub>4</sub> | This work                              |
| NiSe <sub>2</sub> /Ni hybridfoam         | HER                     | 143                                    | 0.5M H <sub>2</sub> SO <sub>4</sub> | Nano Energy 2016, 20, 29.              |
| Ni <sub>2</sub> P                        | HER                     | 75                                     | 0.5M H <sub>2</sub> SO <sub>4</sub> | Journal of Catalysis 2015, 326, 92.    |
| Ni/NiO/CoSe <sub>2</sub>                 | HER                     | 88                                     | 0.5M H <sub>2</sub> SO <sub>4</sub> | Angew. Chem. Int. Ed. 2013, 52, 8546.  |
| NiSe <sub>2</sub> /carbon paper          | HER                     | 135                                    | 0.5M H <sub>2</sub> SO <sub>4</sub> | Chem. Mater. 2015, 27, 5702.           |
| Se-enriched NiSe <sub>2</sub> nanosheets | HER                     | 117                                    | 0.5M H <sub>2</sub> SO <sub>4</sub> | Angew. Chem. Int. Ed. 2016, 128, 7033. |
| MoP                                      | HER                     | 117                                    | 0.5M H <sub>2</sub> SO <sub>4</sub> | Angew. Chem. Int. Ed. 2014, 53, 14433. |
| Mo <sub>2</sub> C-NC                     | HER                     | 124                                    | 0.5M H <sub>2</sub> SO <sub>4</sub> | Angew. Chem. Int. Ed. 2015, 54, 10752. |
| MoCNs@carbon                             | HER                     | 78                                     | 0.5M H <sub>2</sub> SO <sub>4</sub> | Angew. Chem. Int. Ed. 2015, 54, 14723. |
| CoMoN <sub>x</sub> nanosheets            | HER                     | 190                                    | 0.5M H <sub>2</sub> SO <sub>4</sub> | J. Am. Chem. Soc. 2013, 135, 19186.    |
| Ni-Mo-S nanosheets                       | HER                     | 200                                    | 0.5M H <sub>2</sub> SO <sub>4</sub> | Science Advances. 2015, 1, e1500259    |



**Table S3.** Comparison of the HER performance of Mo-Ni<sub>2</sub>P/NF with other reported non-precious HER electrocatalysts in natural electrolyte.

| Catalyst                                       | Water electrolysis test | Overpotential (10mA cm <sup>-2</sup> ) | Electrolyte | Reference                               |
|------------------------------------------------|-------------------------|----------------------------------------|-------------|-----------------------------------------|
| Mo-Ni <sub>2</sub> P                           | HER                     | 84                                     | 1M PBS      | This work                               |
| Ni-C-N nanosheets                              | HER                     | 92.1                                   | 1M PBS      | J. Am. Chem. Soc. 2014, 136,7587.       |
| Ni <sub>3</sub> S <sub>2</sub> /NF             | HER                     | 170                                    | 1M KPi      | J. Am. Chem. Soc. 2015, 137, 14023.     |
| Amorphous MoS <sub>x</sub>                     | HER                     | 280 (at 2 mA cm <sup>-2</sup> )        | PBS         | Chem. Sci. 2011, 2, 1262.               |
| CoNiP/NF                                       | HER                     | 120                                    | 1M KPi      | J. Mater. Chem. A 2016, 4, 10195.       |
| Fe, Co, or Ni-doped amorphous MoS <sub>2</sub> | HER                     | 200-300(at 1 mA cm <sup>-2</sup> )     | PBS         | Chem. Sci. 2012, 3, 2515.               |
| Mo <sub>2</sub> C@NC                           | HER                     | 156                                    | 0.1M PBS    | Angew. Chem., Int. Ed. 2015, 54, 10752. |
| NiS <sub>2</sub> /CC                           | HER                     | 243                                    | 1M PBS      | Electrochim. Acta 2015, 153, 508.       |
| MoS <sub>2</sub> /Ti plate                     | HER                     | 200                                    | 1M PBS      | Electrochim. Acta 2015, 168, 256.       |
| MoS <sub>2</sub> -NS                           | HER                     | 400                                    | 1M PBS      | J. Mater. Chem. A 2014, 2, 13795.       |
